# Supplementary material for: Conflict in the EMS Workforce: An Analysis of an Open-Ended Survey Question Reveals a Complex Assemblage of Stress, Burnout, and Pandemic-Related Factors Influencing Well-Being
Source: MDPI journal article supplement (doi:10.3390/ijerph20105861), 2023-05-18
Supplement: s1 [file s1]

**Table S1.** EMS Clinician Descriptions of Workplace Conflict: Code Dictionary.

**Codes 1-5**

| <b>Everyone's on edge</b>                                                                             | <b>Vaccine, mask, mandate</b>                                                                                                                                                                         | <b>Different beliefs, opinions</b>                   | <b>Staffing difficulties, overwork</b>                                                                                                                                                                      | <b>Burnout spectrum</b>                                                                                                                                                       |
|-------------------------------------------------------------------------------------------------------|-------------------------------------------------------------------------------------------------------------------------------------------------------------------------------------------------------|------------------------------------------------------|-------------------------------------------------------------------------------------------------------------------------------------------------------------------------------------------------------------|-------------------------------------------------------------------------------------------------------------------------------------------------------------------------------|
| Conflicts erupt because people are stressed, irritated, frustrated, easily lose patience/become angry | Conflicts erupt because of specific vaccine/mask mandates or unspecified mandates. This code does not include mandatory overtime, which was included with the "staffing difficulties, overwork" code. | Conflicts erupt over differences in beliefs/opinions | Conflicts erupt because of a variety of issues related to staffing (e.g., short staffed, people quit) and/or being overworked for a variety of reasons (e.g., increased patient volume, mandatory overtime) | Conflicts erupt because people are physically, mentally, and emotionally drained. This energy ebb is on a spectrum from being tired/exhausted to being extremely "burned out" |
| <b>43 word units:</b>                                                                                 | <b>4 word units:</b>                                                                                                                                                                                  | <b>28 word units:</b>                                | <b>47 word units:</b>                                                                                                                                                                                       | <b>11 word units:</b>                                                                                                                                                         |
| fight                                                                                                 | vaccine                                                                                                                                                                                               | judged                                               | staff                                                                                                                                                                                                       | tired                                                                                                                                                                         |
| conflict                                                                                              | mask                                                                                                                                                                                                  | polarized                                            | turnover                                                                                                                                                                                                    | fatigue                                                                                                                                                                       |
| cranky                                                                                                | mandate                                                                                                                                                                                               | controversy                                          | shift cover                                                                                                                                                                                                 | exhaust                                                                                                                                                                       |
| temper                                                                                                | mandatory                                                                                                                                                                                             | opinion                                              | fewer ppl                                                                                                                                                                                                   | burn                                                                                                                                                                          |
| snap                                                                                                  |                                                                                                                                                                                                       | belief                                               | having to cover                                                                                                                                                                                             | displeasure                                                                                                                                                                   |
| irritab                                                                                               |                                                                                                                                                                                                       | believe                                              | many sick                                                                                                                                                                                                   | weary                                                                                                                                                                         |
| disagree                                                                                              |                                                                                                                                                                                                       | divided                                              | understaff                                                                                                                                                                                                  | tiresome                                                                                                                                                                      |
| argu                                                                                                  |                                                                                                                                                                                                       | took it serious                                      | people leaving                                                                                                                                                                                              | butnout                                                                                                                                                                       |
| yell                                                                                                  |                                                                                                                                                                                                       | range of spectrum                                    | manpower                                                                                                                                                                                                    | worn out                                                                                                                                                                      |
| angrier                                                                                               |                                                                                                                                                                                                       | view                                                 | short hand                                                                                                                                                                                                  | brunt out                                                                                                                                                                     |
| attitude                                                                                              |                                                                                                                                                                                                       | not respecting                                       | professionals left                                                                                                                                                                                          | drained                                                                                                                                                                       |
| tens                                                                                                  |                                                                                                                                                                                                       | over kill                                            | work short                                                                                                                                                                                                  |                                                                                                                                                                               |

|                    |  |               |                      |  |
|--------------------|--|---------------|----------------------|--|
| on edge            |  | unnecessary   | cover shift          |  |
| debate             |  | against it    | retirement           |  |
| striff             |  | vs            | coworkers leaving    |  |
| stress             |  | treated as if | short we cannot fill |  |
| bicker             |  | taken against | shift conflict       |  |
| friction           |  | split         | quit                 |  |
| losing patience    |  | values        | shirt staffed        |  |
| agitation          |  | concern       | Covid leave          |  |
| anger              |  | criticizing   | people are leaving   |  |
| short fuse         |  | real or not   | lost several members |  |
| hot point          |  | issue         | losing people        |  |
| strain             |  | options       | people left          |  |
| animosity          |  | who do not    | out sick             |  |
| heated discussions |  | not so much   | pick up shift        |  |
| irritated          |  | standpoints   | people quite         |  |
| frustrat           |  | differences   | work faster          |  |
| bitch              |  |               | late transfers       |  |
| taking it out      |  |               | working to much      |  |
| emotions           |  |               | overtime             |  |
| angry              |  |               | overwork             |  |
| edgey              |  |               | more demand          |  |
| aggravat           |  |               | over work            |  |
| trigger            |  |               | worked to cover      |  |
| turn against       |  |               | work hours           |  |
| salty              |  |               | workload             |  |
| annoy              |  |               | overwhelmed          |  |

|                          |  |  |                     |  |
|--------------------------|--|--|---------------------|--|
| pissed                   |  |  | call volume         |  |
| unhappiness              |  |  | more calls          |  |
| don't have same patients |  |  | call load           |  |
| small issues to bother   |  |  | pick up extra shift |  |
| lively discussion        |  |  | work harder         |  |
|                          |  |  | extra work          |  |
|                          |  |  | forced to work      |  |
|                          |  |  | too many calls      |  |
|                          |  |  | over time           |  |

#### Codes 5-10

| <b>Politics</b>                                                                                                 | <b>Management issues</b>                                                                                             | <b>Policy, protocol issues</b>                                                                            | <b>Covid magnification</b>                                                                              | <b>Covid denial</b>                                                                                                                                                                                      |
|-----------------------------------------------------------------------------------------------------------------|----------------------------------------------------------------------------------------------------------------------|-----------------------------------------------------------------------------------------------------------|---------------------------------------------------------------------------------------------------------|----------------------------------------------------------------------------------------------------------------------------------------------------------------------------------------------------------|
| Conflicts erupt because of "politics". "Politics" is explicitly or implicitly stated as the reason for conflict | Conflicts erupt because of management or leadership failures (e.g., unsupportive, unfair treatment, double standard) | Conflicts erupt because of unclear, inconsistent, frequently changing, poorly enforced policies/protocols | Conflicts erupt because pre-existing issues/difficulties are magnified/heightened by the Covid pandemic | Conflict is related to denial that Covid is real (by coworkers, the media, politicians, etc.), which makes it difficult to deal with the problem in a reliable consistent way (e.g., vaccine compliance) |
| <b>5 word units:</b>                                                                                            | <b>14 word units:</b>                                                                                                | <b>8 word units:</b>                                                                                      | <b>22 word units:</b>                                                                                   | <b>18 word units:</b>                                                                                                                                                                                    |
| politic                                                                                                         | management                                                                                                           | protocol                                                                                                  | large issue                                                                                             | deniers                                                                                                                                                                                                  |
| Trump                                                                                                           | employer                                                                                                             | polic                                                                                                     | become large ones                                                                                       | serious                                                                                                                                                                                                  |
| redneck                                                                                                         | supervisor                                                                                                           | guidelines                                                                                                | lowered threshold                                                                                       | very real                                                                                                                                                                                                |
| pollitic                                                                                                        | leaders                                                                                                              | standards                                                                                                 | insignificant issues                                                                                    | social conditioning                                                                                                                                                                                      |
| Fox                                                                                                             | corporate                                                                                                            | guidance                                                                                                  | issues amplified                                                                                        | flu                                                                                                                                                                                                      |

|  |                 |            |                           |                   |
|--|-----------------|------------|---------------------------|-------------------|
|  | administration  | modify     | everything                | doesn't exist     |
|  | lack of support | subjective | magnified                 | isn't real        |
|  | manager         | consistent | increasing the cumulative | not real          |
|  | administrative  | confusing  | a problem before          | fake              |
|  | reprimand       | rules      | covid 19 imploded         | really exists     |
|  | no real attempt |            | more difficult            | is real           |
|  | terminat        |            | heightened                | was real          |
|  | fir             |            | small issues              | 19nis real        |
|  | disci           |            | small things              | so-called science |
|  |                 |            | another layer             | Covid is a joke   |
|  |                 |            | already taxing            | that it's real    |
|  |                 |            | overly emotional          | Covid exist       |
|  |                 |            | become bigger             | science and work  |
|  |                 |            | already stressful         |                   |
|  |                 |            | bleed over                |                   |
|  |                 |            | little things             |                   |
|  |                 |            | not an issue              |                   |

#### Codes 10-15

| <b>Systems issues</b>                                                                                                                                       | <b>Lack of trust, dishonesty</b>                                                                                                                                        | <b>Rights infringement</b>                                                                                                                                                 | <b>Toxic, hostile workplace</b>                                                                                           | <b>Covid conspiracy</b>                                                                                                |
|-------------------------------------------------------------------------------------------------------------------------------------------------------------|-------------------------------------------------------------------------------------------------------------------------------------------------------------------------|----------------------------------------------------------------------------------------------------------------------------------------------------------------------------|---------------------------------------------------------------------------------------------------------------------------|------------------------------------------------------------------------------------------------------------------------|
| Conflicts erupt because the systems in place to handle the Covid pandemic are inadequate, increasing the burden on EMS workers (e.g., lack of public health | Conflict is related to a lack of trust in coworkers, the public, or the government. There is a perception that people/entities are dishonest (e.g., coworkers lie about | Conflict is related to being forced to do something (e.g., vaccination, mask) that violates your rights/free will (e.g., freedom of choice about what goes into your body) | Conflicts erupt because the work environment is antagonistic to the point of being toxic/hostile (e.g., bullying, hazing) | Conflicts erupt because of differences between those suspicious of a Covid conspiracy and those who believe it is real |

|                                              |                                                                                              |                        |                       |                      |
|----------------------------------------------|----------------------------------------------------------------------------------------------|------------------------|-----------------------|----------------------|
| infrastructure leads to abuse of 911 system) | their Covid status/call out sick when really taking a break, the CDC lies about the vaccine) |                        |                       |                      |
| <b>19 word units:</b>                        | <b>15 word units:</b>                                                                        | <b>9 word units:</b>   | <b>10 word units:</b> | <b>4 word units:</b> |
| operational                                  | false                                                                                        | autonomy               | dumping               | manufacurer          |
| brittle medical                              | people using it                                                                              | own bod                | rude                  | conspiracy           |
| healthcare system                            | trust                                                                                        | have a choice          | bullying              | control the people   |
| call 911 instead                             | not believe                                                                                  | freedom                | hazing                | man made             |
| excessively long decon                       | lost all confidence                                                                          | rights                 | trash talk            |                      |
| misuse of the 911                            | not tell anyone                                                                              | forcing people         | hostil                |                      |
| longer response time                         | call out sick                                                                                | their body             | harassed              |                      |
| divisin of small tasks                       | rat out                                                                                      | being forced           | toxic                 |                      |
| closed trucks                                | abuse of sick                                                                                | left to the individual | unfair                |                      |
| local resources                              | work sick                                                                                    |                        | week minded           |                      |
| ems and er                                   | at greater risk                                                                              |                        |                       |                      |
| public health                                | false information                                                                            |                        |                       |                      |
| supply chain                                 | simply say exposed                                                                           |                        |                       |                      |
| mandate in WA                                | different standards                                                                          |                        |                       |                      |
| cdc                                          | different rules                                                                              |                        |                       |                      |
| state and feds                               |                                                                                              |                        |                       |                      |
| not equipped                                 |                                                                                              |                        |                       |                      |
| ems                                          |                                                                                              |                        |                       |                      |
| cms                                          |                                                                                              |                        |                       |                      |
